# Supplementary material for: Recurrent π–π stacking motifs in three new 4,5-dihydropyrazolyl–thiazole–coumarin hybrids: X-ray characterization, Hirshfeld surface analysis and DFT calculations
Source: Royal Society of Chemistry journal article supplement (doi:10.1039/d0nj02931a), 2020-01-01

## Electronic Supplementary Information file

for manuscript

### **Recurrent $\pi$ - $\pi$ stacking motifs in three new 4,5-dihydropyrazolyl-thiazole-coumarin hybrids: X-ray characterization, Hirshfeld surface analysis and DFT calculations**

Murtaza Madni<sup>a</sup>, Muhammad Naeem Ahmed<sup>b\*</sup>, Muhammad Hafeez<sup>b</sup>, Muhammad Ashfaq<sup>c</sup>,  
Muhammad Nawaz Tahir<sup>c</sup>, Diego M. Gil,<sup>d</sup> Bartomeu Galmés<sup>e</sup>, Shahid Hameed<sup>a\*</sup>, and Antonio  
Frontera<sup>e,\*</sup>

Table of contents:

|                                                             |        |
|-------------------------------------------------------------|--------|
| 1) <sup>1</sup> H-NMR and <sup>13</sup> C-NMR of compound 1 | Page 2 |
| 2) <sup>1</sup> H-NMR and <sup>13</sup> C-NMR of compound 2 | Page 3 |
| 3) <sup>1</sup> H-NMR and <sup>13</sup> C-NMR of compound 3 | Page 4 |

1) <sup>1</sup>H-NMR and <sup>13</sup>C-NMR of compound 1

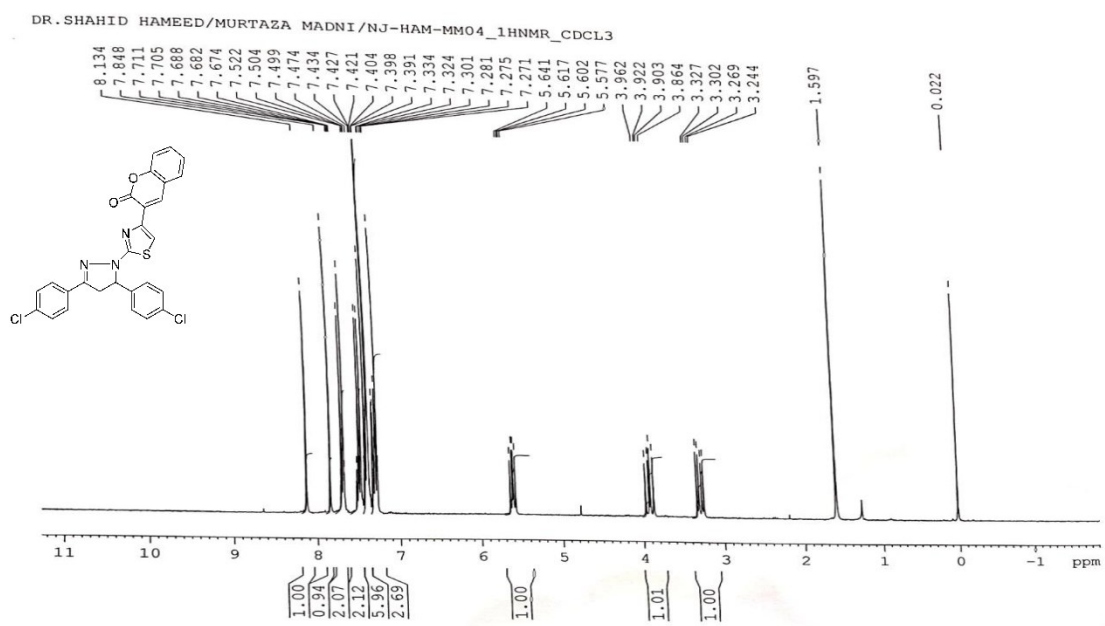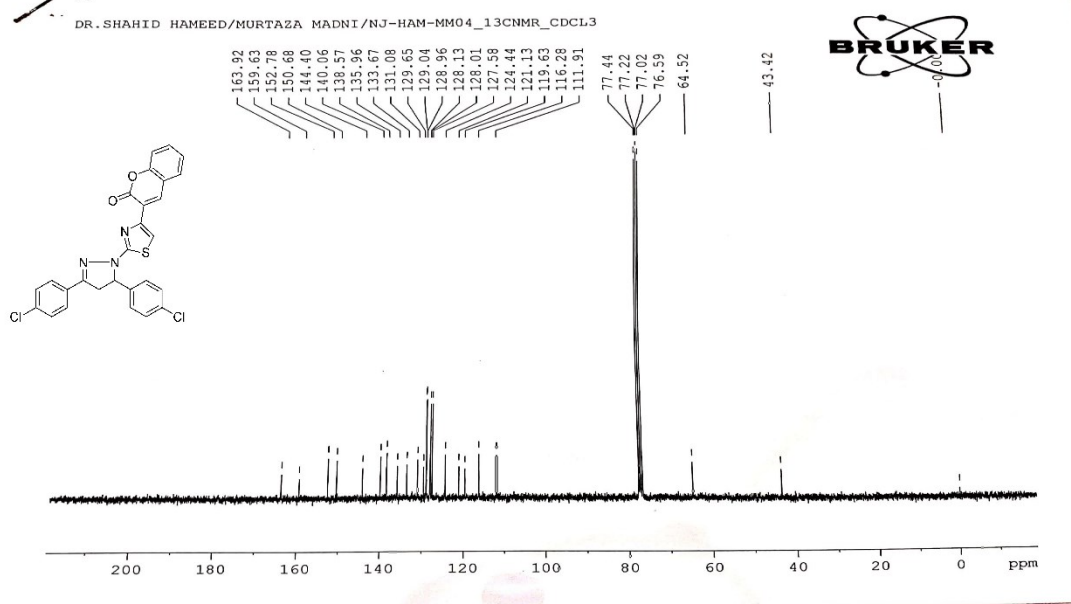

2)  $^1\text{H-NMR}$  and  $^{13}\text{C-NMR}$  of compound **2**

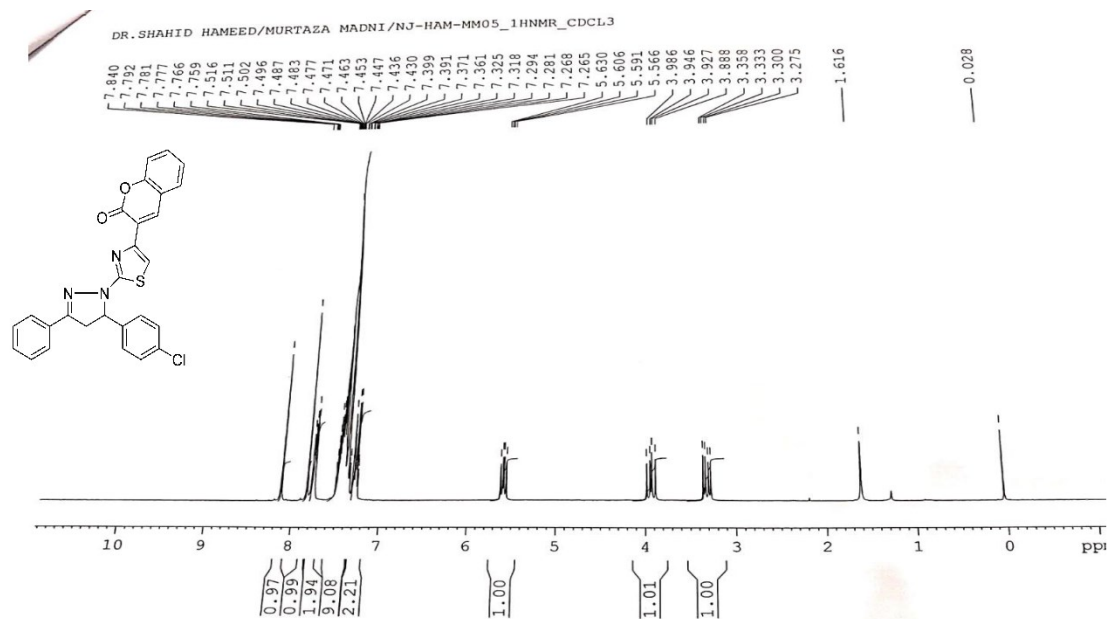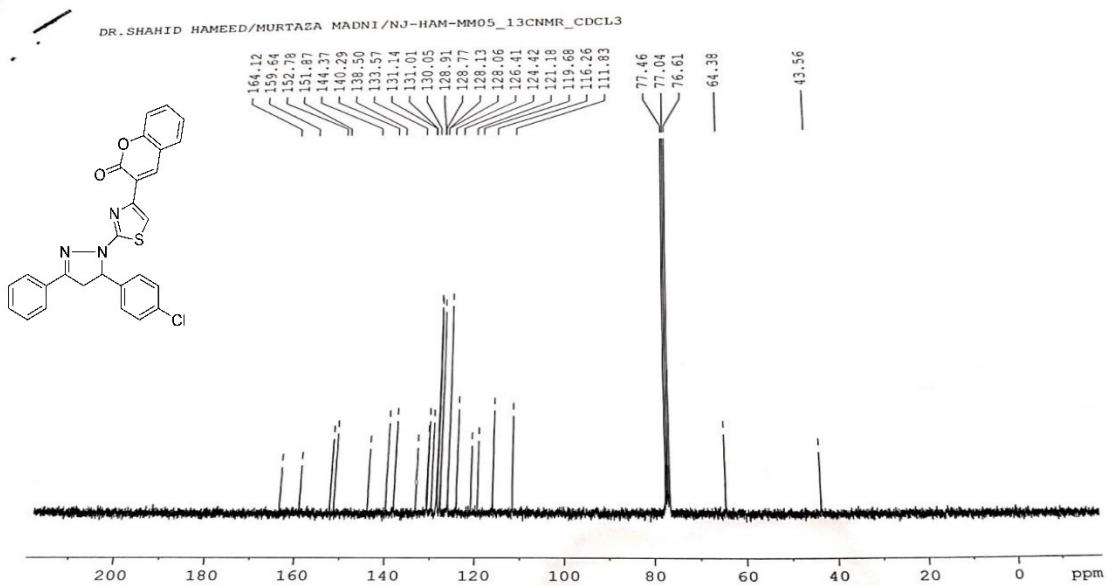

3)  $^1\text{H-NMR}$  and  $^{13}\text{C-NMR}$  of compound **3**

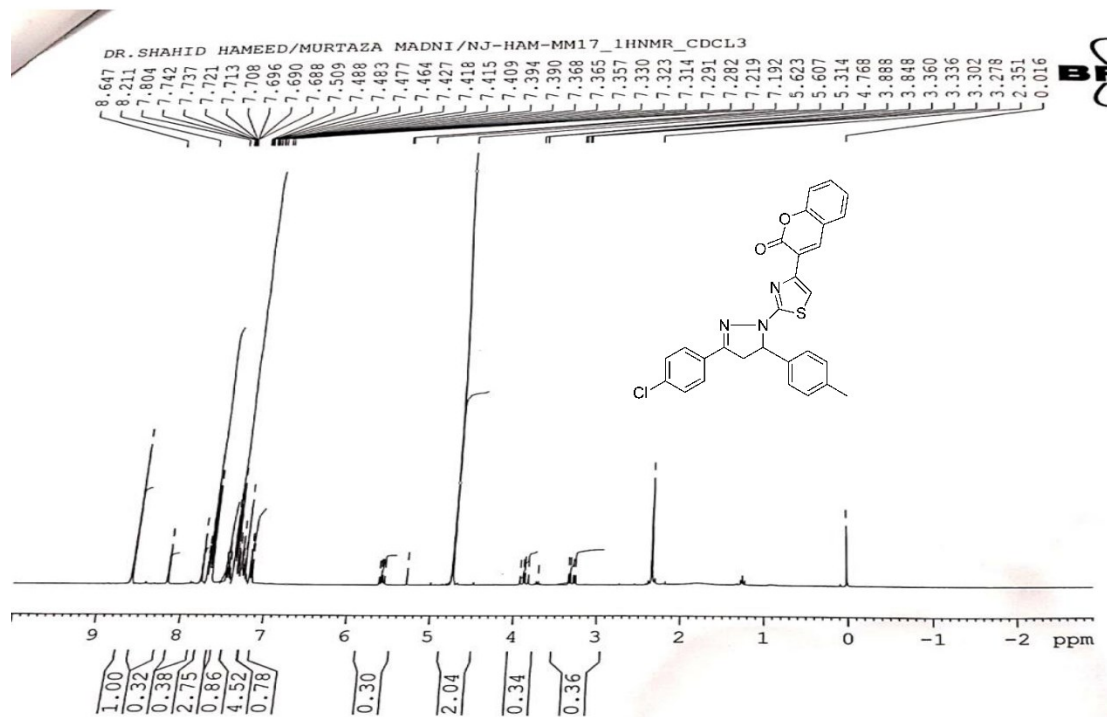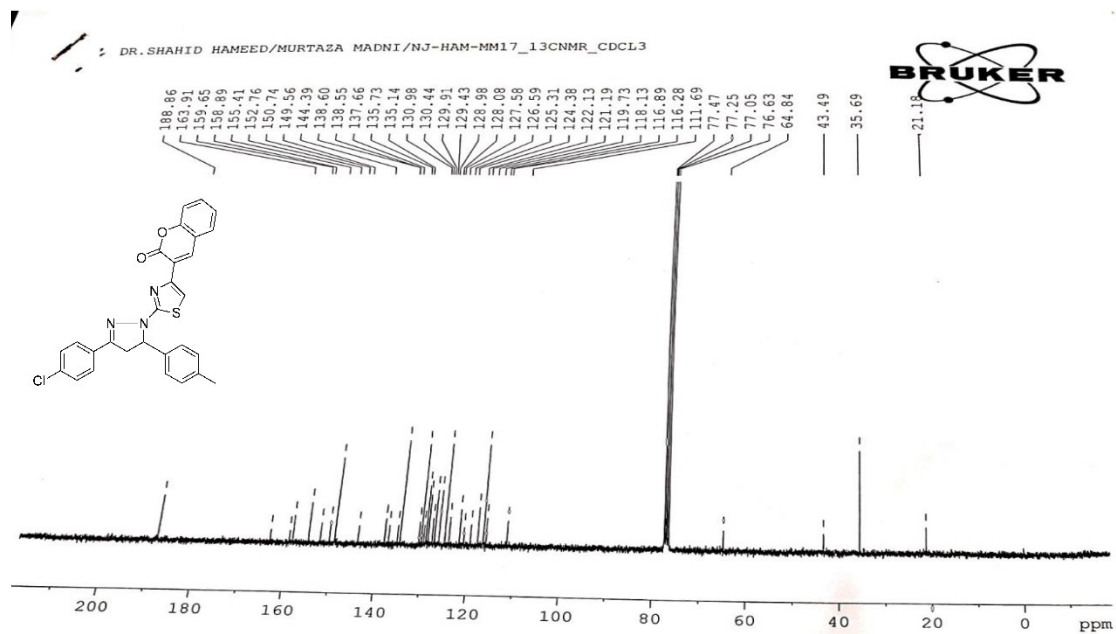

Supplement: d0nj02931a1.pdf [file d0nj02931a1.pdf]
